# Supplementary material for: Reactivity and rotational spectra: the old concept of substitution effects
Source: Royal Society of Chemistry journal article supplement (doi:10.1039/d0cp01145b), 2020-01-01
Supplement: d0cp01145b1.pdf [file d0cp01145b1.pdf]

Table 1: Predicted torsion-rotation parameters and nuclear quadrupole coupling tensor elements for different *o*-halotoluenes on the B3LYP/6-311++g(2d,2p) level of theory.

|                                |       | <sup>19</sup> F | <sup>35</sup> Cl | <sup>37</sup> Cl | <sup>79</sup> Br | <sup>81</sup> Br | <sup>127</sup> I <sup>a</sup> |
|--------------------------------|-------|-----------------|------------------|------------------|------------------|------------------|-------------------------------|
| $A_e$                          | / MHz | 3249.75         | 2852.00          | 2843.44          | 2763.08          | 2762.06          | 2736.94                       |
| $B_e$                          | / MHz | 2184.32         | 1528.48          | 1490.24          | 977.63           | 967.37           | 725.34                        |
| $C_e$                          | / MHz | 1316.82         | 1001.24          | 983.67           | 725.33           | 719.60           | 575.40                        |
| $\tau'_{aaaa}$                 | / MHz | -2.87E-03       | -2.239373E-03    | -2.272676E-03    | -1.759503E-03    | -1.765403E-03    | -                             |
| $\tau'_{bbaa}$                 | / MHz | -7.01E-04       | -8.593302E-04    | -8.539581E-04    | -8.117399E-04    | -8.043124E-04    | -                             |
| $\tau'_{bbbb}$                 | / MHz | -5.34E-04       | -3.051702E-04    | -2.924190E-04    | -1.600799E-04    | -1.573219E-04    | -                             |
| $\tau'_{ccaa}$                 | / MHz | -3.20E-04       | -2.065958E-04    | -2.049531E-04    | -1.084426E-04    | -1.076111E-04    | -                             |
| $\tau'_{cabb}$                 | / MHz | -1.55E-04       | -1.094221E-04    | -1.075298E-04    | -8.578210E-05    | -8.484871E-05    | -                             |
| $\tau'_{cccc}$                 | / MHz | -9.28E-05       | -6.973795E-05    | -6.888219E-05    | -5.393261E-05    | -5.351865E-05    | -                             |
| $3/2^* \chi_{aa}$              | / MHz | -               | -9.868053E+01    | -7.821515E+01    | 8.398216E+02     | 7.030273E+02     | -2.731842E+03                 |
| $1/4^*(\chi_{bb} - \chi_{cc})$ | / MHz | -               | 1.619467E+00     | 1.350175E+00     | -1.196950E+01    | -1.002680E+01    | 3.328667E+01                  |
| $\chi_{ab}$                    | / MHz | -               | 1.455229E+01     | 1.037905E+01     | 1.082150E+01     | 7.749723E+00     | 2.595124E+01                  |

<sup>a</sup>- For Iodine 6-311\*\* was used.

Table 2: Predicted torsion-rotation parameters and nuclear quadrupole coupling tensor element for different *o*-halotoluenes on the MP2/6-311++g(2d,2p) level of theory.

|                                |       | <sup>19</sup> F | <sup>35</sup> Cl | <sup>37</sup> Cl | <sup>79</sup> Br | <sup>81</sup> Br | <sup>127</sup> I <sup>a</sup> |
|--------------------------------|-------|-----------------|------------------|------------------|------------------|------------------|-------------------------------|
| $A_e$                          | / MHz | 3252.84         | 2865.52          | 2856.78          | 2773.80          | 2772.73          | 2750.39                       |
| $B_e$                          | / MHz | 2177.22         | 1529.46          | 1491.49          | 984.68           | 974.40           | 734.96                        |
| $C_e$                          | / MHz | 1314.73         | 1003.31          | 985.80           | 729.95           | 724.21           | 582.04                        |
| $\tau'_{aaaa}$                 | / MHz | -2.185001E-03   | -2.275425E-03    | -2.309020E-03    | -1.789443E-03    | -1.795451E-03    | -                             |
| $\tau'_{bbaa}$                 | / MHz | -1.550701E-03   | -8.379363E-04    | -8.326919E-04    | -7.925314E-04    | -7.854262E-04    | -                             |
| $\tau'_{bbbb}$                 | / MHz | -4.287970E-04   | -2.965011E-04    | -2.840024E-04    | -1.524629E-04    | -1.498322E-04    | -                             |
| $\tau'_{ccaa}$                 | / MHz | -2.947381E-04   | -2.054390E-04    | -2.038181E-04    | -1.076624E-04    | -1.068412E-04    | -                             |
| $\tau'_{ccbb}$                 | / MHz | -1.671904E-04   | -1.054311E-04    | -1.035583E-04    | -8.112417E-05    | -8.024697E-05    | -                             |
| $\tau'_{cccc}$                 | / MHz | -9.343592E-05   | -6.803187E-05    | -6.715603E-05    | -5.134336E-05    | -5.094582E-05    | -                             |
| $3/2^* \chi_{aa}$              | / MHz | -               | -9.691183E+01    | -7.680456E+01    | 8.089923E+02     | 6.772112E+02     | -2.647378E+03                 |
| $1/4^*(\chi_{bb} - \chi_{cc})$ | / MHz | -               | 1.261928E+00     | 1.065615E+00     | -1.006060E+01    | -8.427282E+00    | 2.901938E+01                  |
| $\chi_{ab}$                    | / MHz | -               | -1.399106E+01    | -9.962374E+00    | -8.466527E+00    | -5.806944E+00    | -4.507113E+01                 |

<sup>a</sup>- For Iodine 6-311\*\* was used.
